# Supplementary material
Source: PubMed Central journal article supplement (PMC10843484)

## Supplemental Material

**Fig S1:** CoV and % maximum difference as a function of the distance from the source voxel for a)  $^{177}\text{Lu}$  DVKs and b)  $^{90}\text{Y}$  DVKs (part of data are out of range). For better visualization, the values at different voxels but corresponding to the same distance have been averaged.

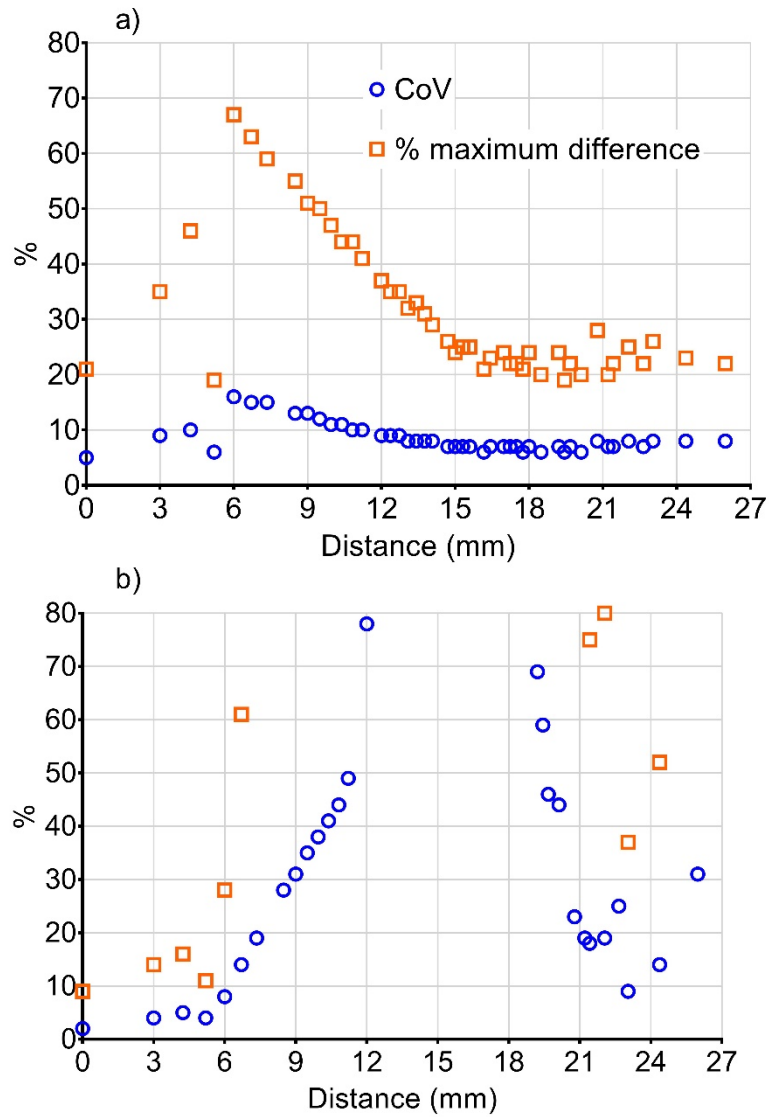

Table S1: Mean AD, D10 and D90 obtained with the different DVKs for patient 4.

| Patient<br>4    | Amato      |       |       | Graves     |       |       | Lanconelli |       |       | Pistone    |       |       | Pistone_AM |       |       | Salvat     |       |       | Tranel     |       |       | Vergara    |       |       | UMICH DPM  |       |       |
|-----------------|------------|-------|-------|------------|-------|-------|------------|-------|-------|------------|-------|-------|------------|-------|-------|------------|-------|-------|------------|-------|-------|------------|-------|-------|------------|-------|-------|
|                 | Mean<br>AD | D10   | D90   |
| Right<br>Kidney | 2.51       | 3.41  | 1.48  | 2.67       | 3.61  | 1.61  | 2.44       | 3.33  | 1.45  | 2.61       | 3.55  | 1.55  | 2.61       | 3.54  | 1.53  | 2.60       | 3.54  | 1.54  | 2.67       | 3.64  | 1.58  | 2.89       | 3.94  | 1.71  | 2.69       | 3.63  | 1.62  |
| Left<br>Kidney  | 2.58       | 3.49  | 1.56  | 2.74       | 3.68  | 1.68  | 2.52       | 3.40  | 1.53  | 2.69       | 3.64  | 1.63  | 2.69       | 3.63  | 1.63  | 2.68       | 3.63  | 1.62  | 2.76       | 3.72  | 1.67  | 2.98       | 4.02  | 1.80  | 2.75       | 3.70  | 1.69  |
| Tumor<br>1      | 18.93      | 31.32 | 7.49  | 19.78      | 32.64 | 7.92  | 18.45      | 30.53 | 7.29  | 19.69      | 32.60 | 7.78  | 19.68      | 32.57 | 7.78  | 19.67      | 32.56 | 7.77  | 20.20      | 33.42 | 7.99  | 21.86      | 36.20 | 8.63  | 19.90      | 32.83 | 7.96  |
| Tumor<br>2      | 27.30      | 39.69 | 13.34 | 28.34      | 41.15 | 13.86 | 26.57      | 38.63 | 12.97 | 28.41      | 41.28 | 13.86 | 28.39      | 41.26 | 13.86 | 28.36      | 41.24 | 13.85 | 29.09      | 42.28 | 14.23 | 31.58      | 45.94 | 15.42 | 28.50      | 41.38 | 13.95 |

Table S2: Mean AD, D10 and D90 obtained with the different DVKs for patient 6.

| Patient<br>6    | Amato      |       |       | Graves     |       |       | Lanconelli |       |       | Pistone    |       |       | Pistone_AM |       |       | Salvat     |       |       | Tranel     |       |       | Vergara    |       |       | UMICH DPM  |       |       |
|-----------------|------------|-------|-------|------------|-------|-------|------------|-------|-------|------------|-------|-------|------------|-------|-------|------------|-------|-------|------------|-------|-------|------------|-------|-------|------------|-------|-------|
|                 | Mean<br>AD | D10   | D90   |
| Right<br>Kidney | 5.14       | 7.24  | 2.64  | 5.43       | 7.60  | 2.84  | 5.01       | 7.05  | 2.58  | 5.35       | 7.53  | 2.75  | 5.35       | 7.53  | 2.75  | 5.34       | 7.52  | 2.75  | 5.49       | 7.72  | 2.83  | 5.94       | 8.36  | 3.06  | 5.46       | 7.64  | 2.86  |
| Left<br>Kidney  | 3.27       | 4.95  | 1.70  | 3.48       | 5.22  | 1.85  | 3.18       | 4.83  | 1.65  | 3.40       | 5.16  | 1.77  | 3.40       | 5.15  | 1.76  | 3.40       | 5.15  | 1.76  | 3.49       | 5.29  | 1.82  | 3.78       | 5.73  | 1.96  | 3.49       | 5.25  | 1.86  |
| Tumor<br>1      | 3.05       | 3.90  | 2.17  | 3.22       | 4.11  | 2.32  | 2.96       | 3.81  | 2.11  | 3.16       | 4.06  | 2.27  | 3.16       | 4.16  | 2.27  | 3.16       | 4.06  | 2.26  | 3.25       | 4.16  | 2.32  | 3.52       | 4.51  | 2.51  | 3.24       | 4.13  | 2.33  |
| Tumor<br>2      | 29.57      | 37.42 | 21.03 | 30.72      | 38.86 | 21.86 | 28.81      | 36.46 | 20.49 | 30.78      | 38.95 | 21.87 | 30.75      | 38.91 | 21.86 | 30.73      | 38.88 | 21.84 | 31.52      | 39.88 | 22.42 | 34.21      | 43.26 | 24.29 | 30.90      | 39.08 | 22.01 |
| Tumor<br>3      | 2.94       | 4.18  | 1.60  | 3.15       | 4.44  | 1.77  | 2.87       | 4.08  | 1.57  | 3.06       | 4.36  | 1.68  | 3.06       | 4.35  | 1.67  | 3.06       | 4.34  | 1.67  | 3.14       | 4.46  | 1.72  | 3.40       | 4.83  | 1.85  | 3.17       | 4.46  | 1.78  |
| Tumor<br>4      | 3.56       | 6.27  | 1.21  | 3.75       | 6.56  | 1.32  | 3.47       | 6.10  | 1.19  | 3.71       | 6.52  | 1.26  | 3.71       | 6.52  | 1.26  | 3.70       | 6.52  | 1.26  | 3.80       | 6.69  | 1.29  | 4.12       | 7.25  | 1.39  | 3.77       | 6.60  | 1.33  |

Table S3: Mean AD, D10 and D90 obtained with the different DVKs for patient 26.

| Patient 26    | Amato   |         |        | Bolch   |         |        | Graves  |         |        | Lanconelli |        |        | Pistone |         |        | Salvat  |         |        | Tranel  |         |        | Vergara |         |        | UMICH DPM |         |        |
|---------------|---------|---------|--------|---------|---------|--------|---------|---------|--------|------------|--------|--------|---------|---------|--------|---------|---------|--------|---------|---------|--------|---------|---------|--------|-----------|---------|--------|
|               | Mean AD | D10     | D90    | Mean AD | D10     | D90    | Mean AD | D10     | D90    | Mean AD    | D10    | D90    | Mean AD | D10     | D90    | Mean AD | D10     | D90    | Mean AD | D10     | D90    | Mean AD | D10     | D90    | Mean AD   | D10     | D90    |
| Liver         | 69.58   | 185.12  | 0.48   | 69.62   | 185.54  | 0.48   | 66.93   | 178.29  | 0.46   | 62.76      | 167.14 | 0.43   | 66.92   | 179.86  | 0.46   | 66.90   | 178.29  | 0.46   | 66.84   | 178.05  | 0.46   | 72.06   | 192.06  | 0.50   | 66.48     | 177.13  | 0.46   |
| Healthy Liver | 66.58   | 177.33  | 0.45   | 66.65   | 177.74  | 0.45   | 64.07   | 170.79  | 0.43   | 60.07      | 160.04 | 0.41   | 64.05   | 172.29  | 0.43   | 64.05   | 170.77  | 0.43   | 63.98   | 170.51  | 0.43   | 68.99   | 184.01  | 0.47   | 63.64     | 169.70  | 0.43   |
| Tumor 1       | 227.30  | 339.84  | 122.84 | 226.32  | 336.79  | 123.14 | 218.97  | 325.01  | 118.31 | 204.77     | 305.81 | 111.06 | 218.30  | 329.27  | 118.33 | 217.63  | 324.06  | 118.19 | 217.54  | 324.11  | 118.10 | 234.28  | 348.60  | 127.45 | 216.24    | 322.02  | 117.54 |
| Tumor 2       | 466.28  | 754.57  | 179.23 | 462.67  | 745.69  | 183.25 | 446.19  | 720.07  | 174.94 | 419.71     | 678.17 | 162.83 | 447.39  | 730.19  | 173.37 | 445.05  | 717.63  | 176.23 | 445.05  | 717.90  | 175.42 | 478.91  | 771.84  | 190.26 | 442.22    | 713.13  | 174.81 |
| Tumor 3       | 65.59   | 126.98  | 13.82  | 65.34   | 125.22  | 14.45  | 62.92   | 121.10  | 13.73  | 59.15      | 114.09 | 12.78  | 63.01   | 122.72  | 13.48  | 62.81   | 120.40  | 13.87  | 62.79   | 120.60  | 13.73  | 67.63   | 129.48  | 14.92  | 62.42     | 119.70  | 13.72  |
| Tumor 4       | 699.06  | 1094.18 | 301.06 | 691.11  | 1075.05 | 303.78 | 667.44  | 1040.60 | 290.97 | 628.24     | 979.37 | 270.95 | 670.08  | 1056.85 | 289.98 | 664.94  | 1035.30 | 292.16 | 665.30  | 1036.30 | 291.09 | 715.23  | 1112.80 | 314.89 | 660.76    | 1028.80 | 289.89 |

Table S4: Mean AD, D10 and D90 obtained with the different DVKs for patient 56.

| Patient 56    | Amato   |        |        | Bolch   |        |        | Graves  |        |        | Lanconelli |        |        | Pistone |        |        | Salvat  |        |        | Tranel  |        |        | Vergara |        |        | UMICH DPM |        |        |
|---------------|---------|--------|--------|---------|--------|--------|---------|--------|--------|------------|--------|--------|---------|--------|--------|---------|--------|--------|---------|--------|--------|---------|--------|--------|-----------|--------|--------|
|               | Mean AD | D10    | D90    | Mean AD | D10    | D90    | Mean AD | D10    | D90    | Mean AD    | D10    | D90    | Mean AD | D10    | D90    | Mean AD | D10    | D90    | Mean AD | D10    | D90    | Mean AD | D10    | D90    | Mean AD   | D10    | D90    |
| Liver         | 54.15   | 122.11 | 0.34   | 54.19   | 121.96 | 0.33   | 52.10   | 117.33 | 0.32   | 48.86      | 110.10 | 0.30   | 52.09   | 118.51 | 0.32   | 52.08   | 117.22 | 0.32   | 52.03   | 117.14 | 0.31   | 56.10   | 126.25 | 0.34   | 51.75     | 116.46 | 0.32   |
| Healthy Liver | 49.81   | 118.03 | 0.33   | 49.88   | 117.99 | 0.33   | 47.94   | 113.47 | 0.32   | 44.95      | 106.43 | 0.29   | 47.92   | 114.59 | 0.32   | 47.93   | 113.41 | 0.32   | 47.87   | 113.31 | 0.31   | 51.63   | 122.14 | 0.34   | 47.62     | 112.68 | 0.31   |
| Tumor 1       | 446.64  | 705.10 | 237.66 | 444.79  | 698.98 | 238.23 | 428.37  | 675.24 | 228.75 | 402.34     | 635.32 | 213.65 | 428.99  | 683.63 | 228.61 | 427.72  | 672.22 | 229.15 | 427.52  | 672.71 | 228.68 | 460.46  | 723.23 | 246.79 | 424.98    | 668.15 | 227.40 |
| Tumor 2       | 110.87  | 167.77 | 41.45  | 110.20  | 165.42 | 42.12  | 106.20  | 159.94 | 40.24  | 99.96      | 150.88 | 37.29  | 106.43  | 162.25 | 40.03  | 106.98  | 159.16 | 40.45  | 105.96  | 159.29 | 40.34  | 114.07  | 171.15 | 43.65  | 105.31    | 158.13 | 40.21  |

**Fig S2:**  $^{177}\text{Lu}$  for a) 2.4 mm and b) 4.0 mm voxel size as a function of the distance from the source voxel. For better visualization, the values at different voxels but corresponding to the same distance have been averaged.

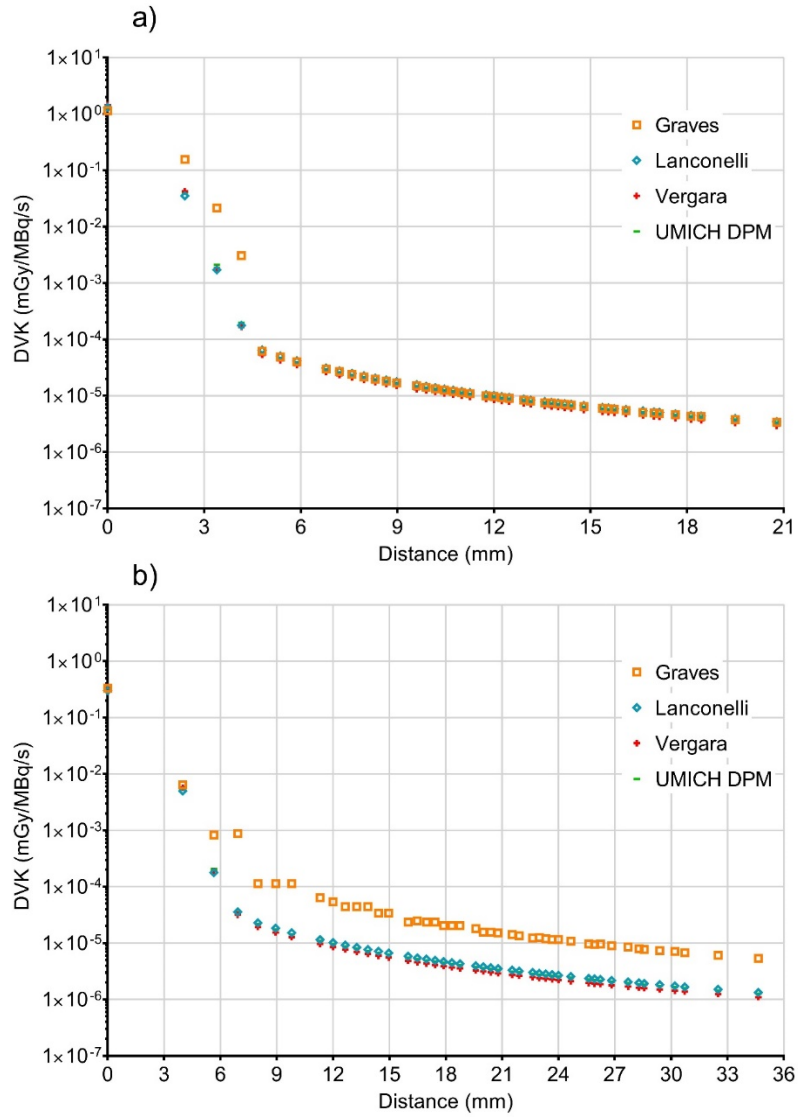

**Fig S3:**  $^{90}\text{Y}$  DVKs for a) 2.4 mm and b) 4.0 mm voxel size as a function of the distance from the source voxel. For better visualization, the values at different voxels but corresponding to the same distance have been averaged.

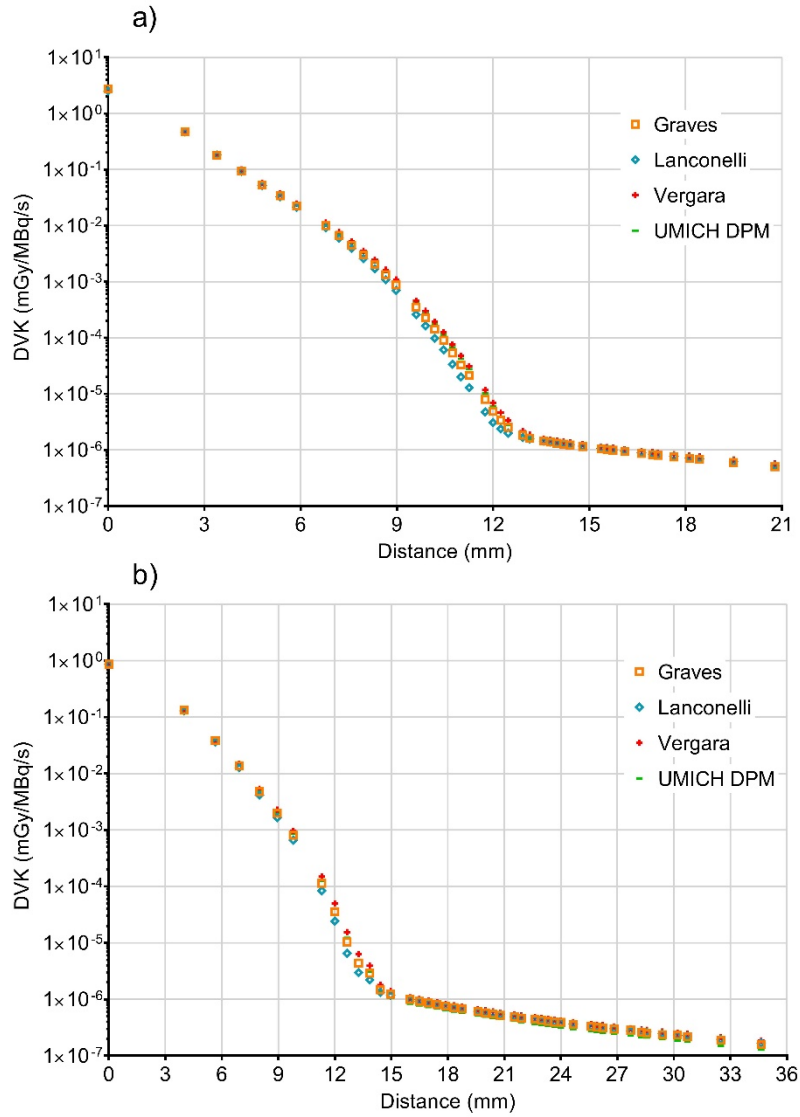

Supplement: NIHMS1929862-supplement-Supinfo.pdf [file NIHMS1929862-supplement-Supinfo.pdf]
